# Supplementary material for: Large scale phenotypic characterisation of Hierophis viridiflavus (Squamata: Serpentes) suggests genetic admixture between closely related lineages
Source: Research Square preprint supplement (doi:10.21203/rs.3.rs-1757976/v1), 2022-06-22
Supplement: Supplementary file 1 [file a0bd81de840114ca31486dd2.docx]

Supplementary Material

**S1 - Corine Environmental Categories**

#e6004d;label=111;Continuous urban fabric;1

#ff0000;label=112;Discontinuous urban fabric;2

#cc4df2;label=121;Industrial or commercial units;3

#cc0000;label=122;Road and rail networks and associated land;4

#e6cccc;label=123;Port areas;5

#e6cce6;label=124;Airports;6

#a600cc;label=131;Mineral extraction sites;7

#a64d00;label=132;Dump sites;8

#ff4dff;label=133;Construction sites;9

#ffa6ff;label=141;Green urban areas;10

#ffe6ff;label=142;Sport and leisure facilities;11

#ffffa8;label=211;Non-irrigated arable land;12

#ffff00;label=212;Permanently irrigated land;13

#e6e600;label=213;Rice fields;14

#e68000;label=221;Vineyards;15

#f2a64d;label=222;Fruit trees and berry plantations;16

#e6a600;label=223;Olive groves;17

#e6e64d;label=231;Pastures;18

#ffe6a6;label=241;Annual crops associated with permanent crops;19

#ffe64d;label=242;Complex cultivation patterns;20

#e6cc4d;label=243;Land principally occupied by agriculture with significant areas of natural vegetation;21

#f2cca6;label=244;Agro-forestry areas;22

#80ff00;label=311;Broad-leaved forest;23

#00a600;label=312;Coniferous forest;24

#4dff00;label=313;Mixed forest;25

#ccf24d;label=321;Natural grasslands;26

#a6ff80;label=322;Moors and heathland;27

#a6e64d;label=323;Sclerophyllous vegetation;28

#a6f200;label=324;Transitional woodland-shrub;29

#e6e6e6;label=331;Beaches-dunes-sands;30

#cccccc;label=332;Bare rocks;31

#ccffcc;label=333;Sparsely vegetated areas;32

#000000;label=334;Burnt areas;33

#a6e6cc;label=335;Glaciers and perpetual snow;34

#a6a6ff;label=411;Inland marshes;35

#4d4dff;label=412;Peat bogs;36

#ccccff;label=421;Salt marshes;37

#e6e6ff;label=422;Salines;38

#a6a6e6;label=423;Intertidal flats;39

#00ccf2;label=511;Water courses;40

#80f2e6;label=512;Water bodies;41

#00ffa6;label=521;Coastal lagoons;42

#a6ffe6;label=522;Estuaries;43

#e6f2ff;label=523;Sea and ocean;44

#ffffff;label=999;NODATA;48

Categories selected and pooled by group that entered the analyses as predictors:

- Meadows: 10, 18, 26, 27;
- Rocks: 30, 31;
- Woods: 23, 24, 25, 29;
- Cultivated land: 12, 15, 17, 19.

| **Variable** | **β0** | **SE** | **P** |
| --- | --- | --- | --- |
| Genotype | -6.308 | 2.318 | < 0.05 |
| Latitude (1) | -28.726 | 12.747 | < 0.05 |
| Latitude (2) | 5.917 | 14.655 | 0.686 |
| Latitude (3) | 11.185 | 12.267 | 0.361 |
| Longitude (1) | 7.053 | 17.812 | 0.692 |
| Longitude (2) | -52.276 | 22.505 | < 0.05 |
| Longitude (3) | -43.017 | 20.535 | < 0.05 |
| Elevation | 0.517 | 0.140 | < 0.001 |
| Latitude (1) * gen | 72.192 | 17.937 | < 0.0001 |
| Latitude (2) * gen | 45.198 | 17.063 | < 0.05 |
| Latitude (3) * gen | 0.192 | 16.305 | 0.990 |
| Longitude (1) * gen | 1022.166 | 227.697 | < 0.0001 |
| Longitude (2) * gen | -535.216 | 155.798 | < 0.001 |
| Longitude (3) * gen | 268.865 | 74.401 | < 0.001 |
| Elevation * gen | 0.564 | 0.194 | < 0.05 |

**Supplementary Table 1.** Estimation of the effects of the geographic variables and their interactions with genotype retrieved from the first GLM. Numbers in brackets indicate the exponential grade of the polynoms of latitude and longitude.

|  | **Variable** | **β0** | **SE** | **P** |
| --- | --- | --- | --- | --- |
| Sardinia | BIO1 | 0.023 | 0.226 | 0.919 |
| BIO4 | -0.241 | 0.238 | 0.311 |
| *carbonarius* | BIO1 | 0.392 | 0.093 | < 0.0001 |
| BIO4 | -0.335 | 0.077 | < 0.0001 |

**Supplementary Table 2.** Estimation of the effects of the climatic variables in the two polymorphic groups retrieved from the second GLM.

|  | **Variable** | **β0** | **SE** | **P** |
| --- | --- | --- | --- | --- |
| Sardinia | Meadows | 0.241 | 0.214 | 0.260 |
| Rocks | 0.110 | 0.231 | 0.631 |
| Woods | 0.460 | 0.235 | 0.05 |
| Cultivated | 0.098 | 0.263 | 0.707 |
| *carbonarius* | Meadows | -0.019 | 0.070 | 0.780 |
| Rocks | 0.119 | 0.099 | 0.226 |
| Woods | -0.078 | 0.077 | 0.314 |
| Cultivated | -0.101 | -1.308 | 0.191 |

**Supplementary Table 3.** Estimation of the effects of the habitat variables in the two polymorphic groups retrieved from the third GLM.

| **Transect** | **Code** | **Km** | **Ntot** | **Mean** | **Max** |
| --- | --- | --- | --- | --- | --- |
| Torino-Sondrio | TO-SO | 210 | 212 | 2.4 | 6 |
| Genova-Sondrio | GE-SO | 210 | 114 | 4.4 | 8 |
| Spezia-Padova | SP-PD | 220 | 117 | 4.3 | 9 |
| Livorno-Rimini | LI-RI | 190 | 94 | 5.3 | 9 |
| Orbetello-Ancona | OR-AN | 230 | 82 | 6.1 | 10 |
| Roma-Pescara | RM-PE | 180 | 79 | 6.3 | 12 |
| Roma-Barletta | RM-BL | 230 | 126 | 4.0 | 8 |
| Roma-Salerno | RM-SA | 180 | 90 | 5.6 | 11 |
| **Means** |  | 206 | 114 | 4.8 | 9.1 |

**Supplementary Table 4.** Table of the transects identified across the putative contact zone between the two main lineages of *Hierophis viridiflavus*
